# Supplementary material for: Fluorescence lifetime imaging microscopy reveals sodium pump dimers in live cells
Source: PubMed Central journal article supplement (PMC9048134; doi:10.1016/j.jbc.2022.101865), 2022-03-24
Supplement: mmc1.pdf [file mmc1.pdf]

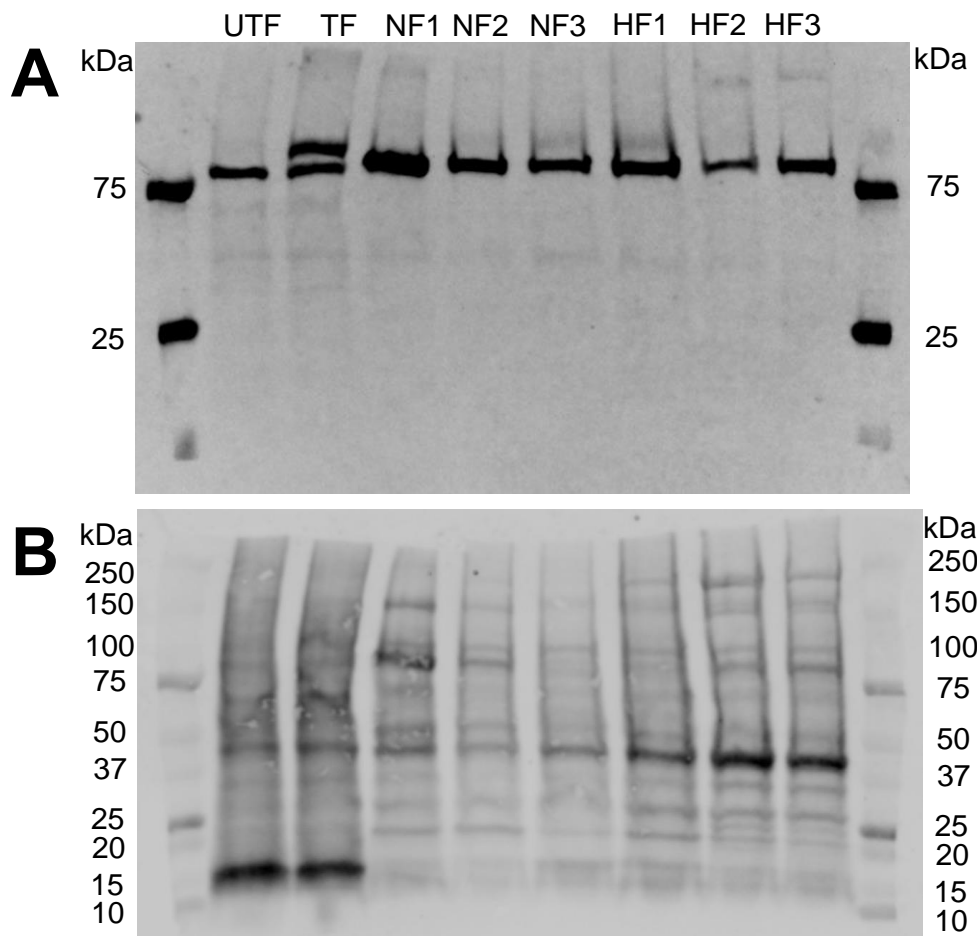

**Sup. Fig. 1:** Uncropped Western blot (as in Fig. 1) for analysis of sodium pump expression in heterologous cells and myocardium. **(A)** Un-transfected HEK cell microsomal fractions (UTF) showed endogenous NKA with an apparent MW of 100 kDa. Microsomes from cells transfected with human mCer- $\alpha_1$  NKA (TF) showed bands representing endogenous NKA and exogenous fluorescent NKA, which showed a decreased mobility due to the 30 kDa tag. NKA was highly expressed in microsomal fractions isolated from human myocardium. We observed decreased expression of NKA in failing human heart (HF1-3) compared to non-failing hearts (NF1-3). **(B)** Total protein staining (Revert). TF and UTF data represent 3 independent transfections. NF and HF data represent tissue samples from 8 non-failing donor hearts and 8 explanted hearts with dilated cardiomyopathy.

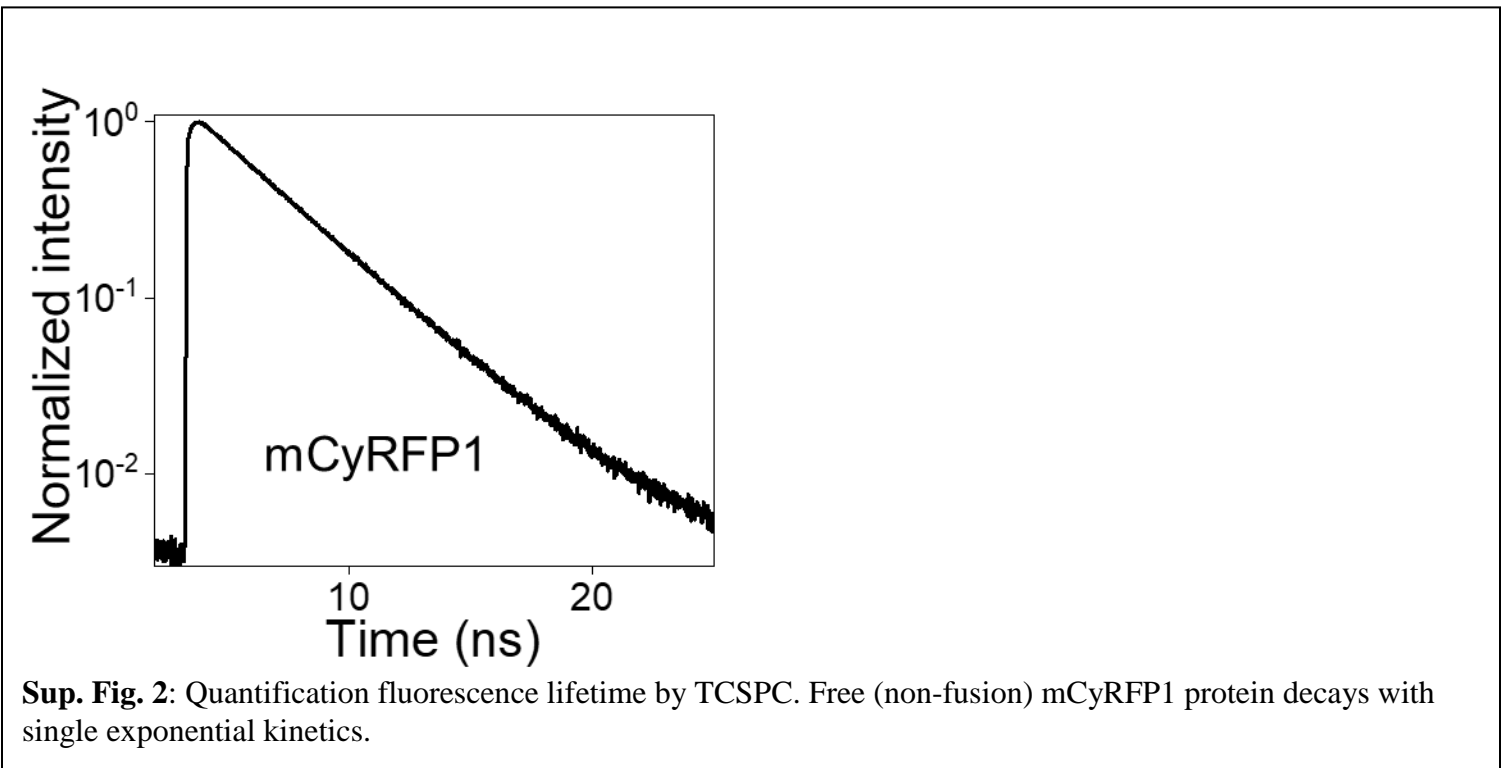

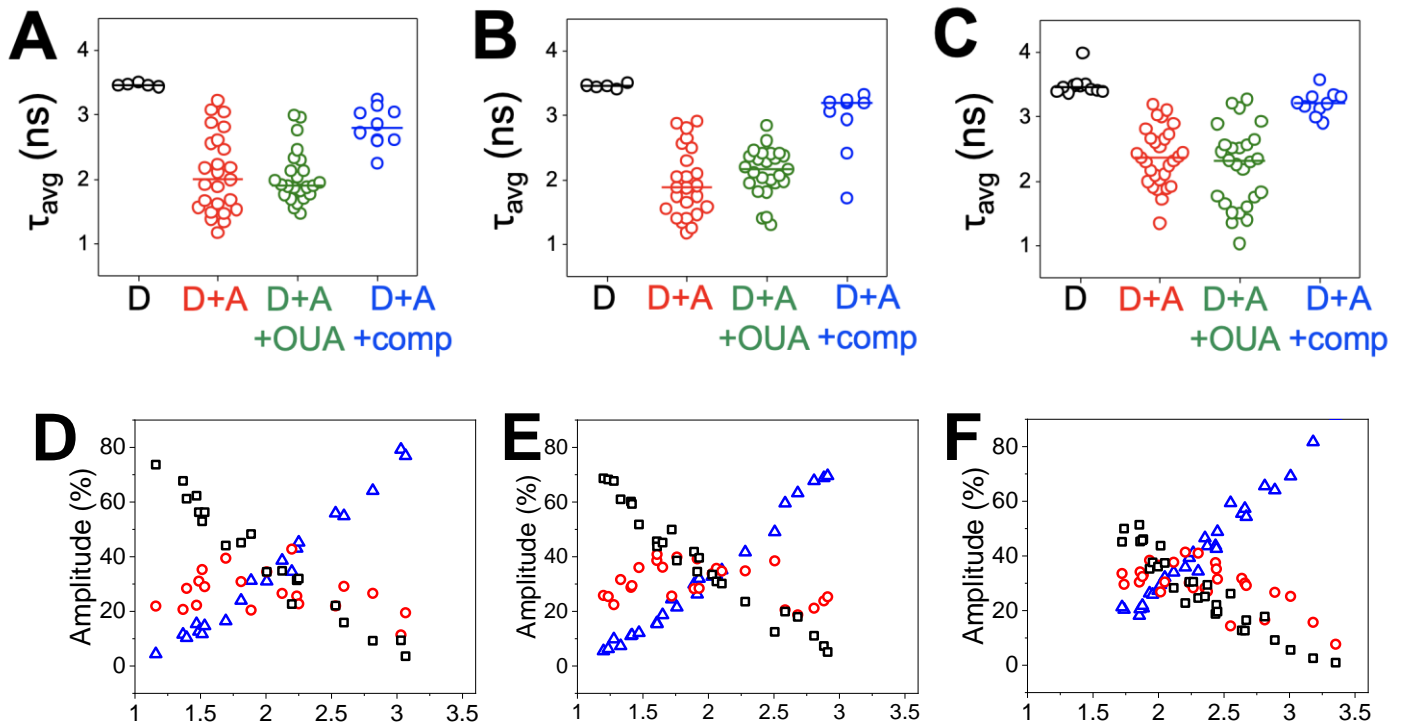

**Sup. Fig. 3:** Quantification of fluorescence decays. (A) A decreased fluorescence lifetime indicates FRET between donor-labeled  $\alpha_1$  (D) and acceptor labeled PLM (A). FRET was not affected by addition of ouabain (OUA). FRET was reduced by co-expression of unlabeled PLM. (B) As in (A), but with the  $\alpha_2$  isoform. (C) As in (A),  $\alpha_3$  isoform. (D) The relative population of FRET species for  $\alpha_1$ . (E) The relative population of FRET species for  $\alpha_2$ . (F) The relative population of FRET species for  $\alpha_3$ . We observed no differences for  $\alpha$  subunit isoforms, so the data were combined and analyzed collectively.

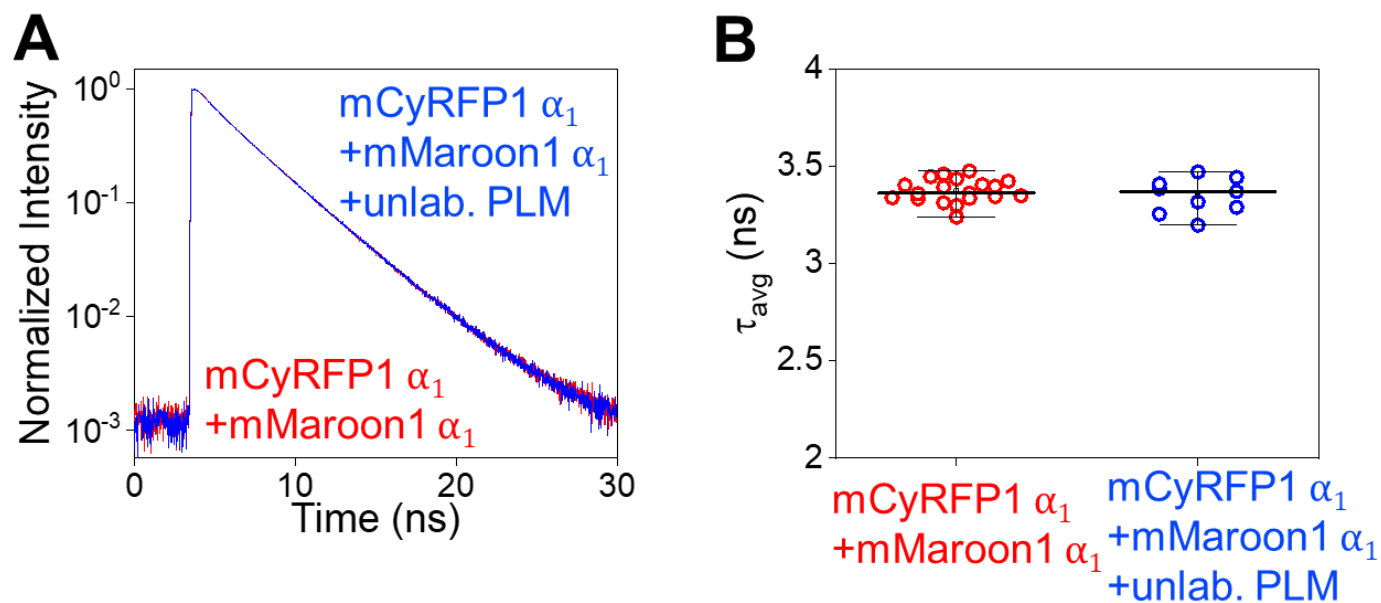

**Sup. Fig. 4:** Quantification of changes in NKA-PLM regulatory complex caused by the presence of unlabeled PLM detected by TCSPC. **(A)** The fluorescence decay of  $\alpha$ - $\alpha$  pair (red) and  $\alpha$ - $\alpha$ -unlabeled PLM (blue). Data are averages of 10 (for  $\alpha$ - $\alpha$ ) or 9 (for  $\alpha$ - $\alpha$ +PLM) decay curves **(B)** Average fluorescence lifetime for mCyRFP1- $\alpha_1$  co-expressed with mMaroon1- $\alpha_1$ . (red circles) and the same pair of the donor and acceptor in the presence of unlabeled PLM as a competitor (blue circles). Presence of the unlabeled PLM does not affect  $\alpha$ - $\alpha$  FRET.

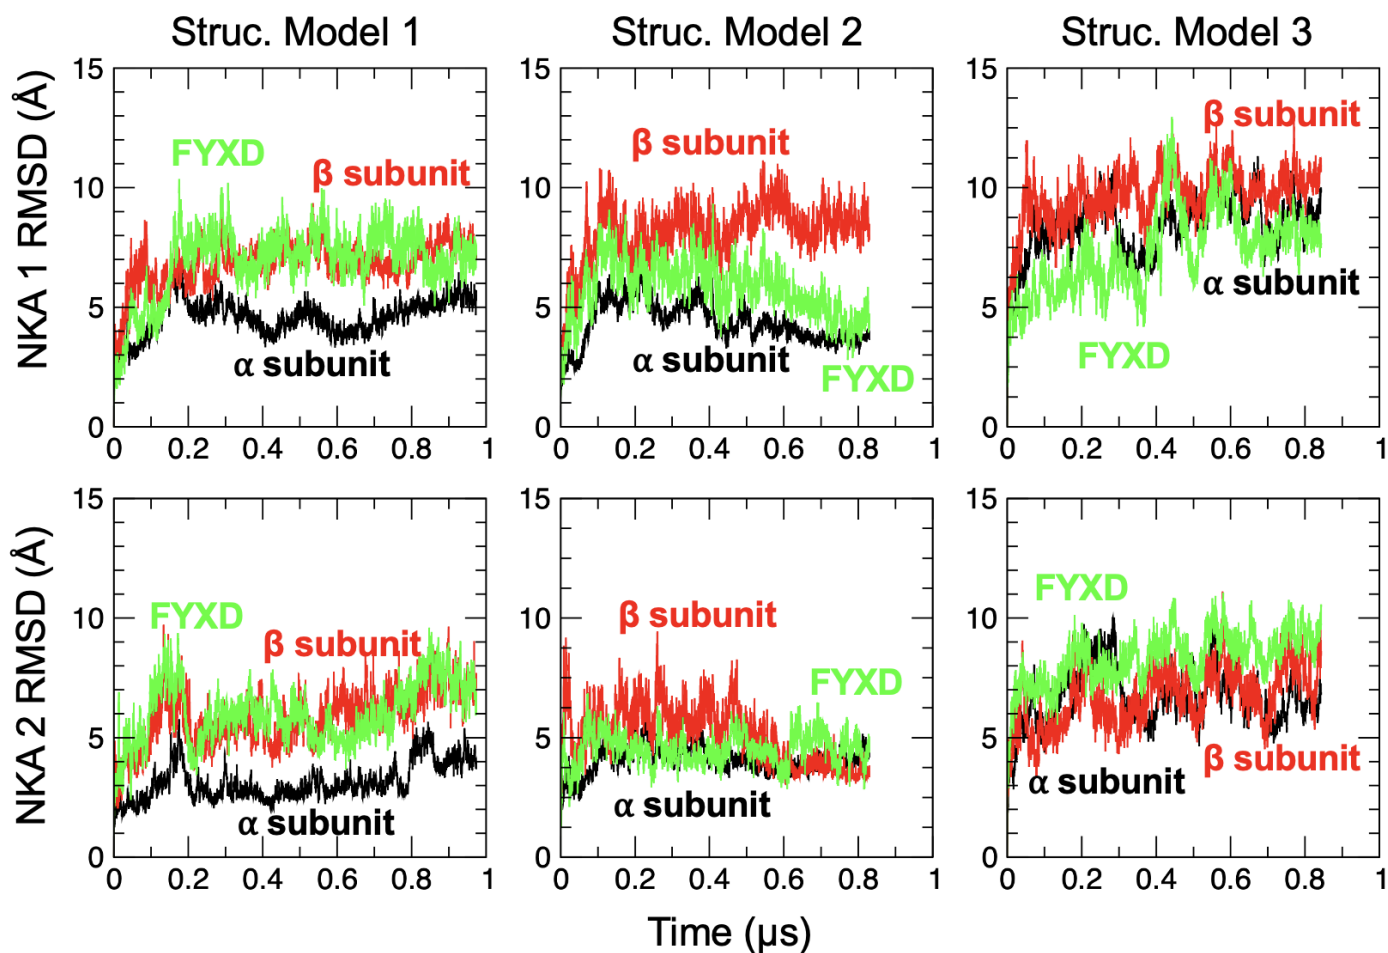

**Sup. Fig. 5:** RMSD for  $\alpha$  (black),  $\beta$  (red), and FYXD (green) was calculated by aligning the backbone of the entire dimer with the structure at the beginning of each MD trajectory.

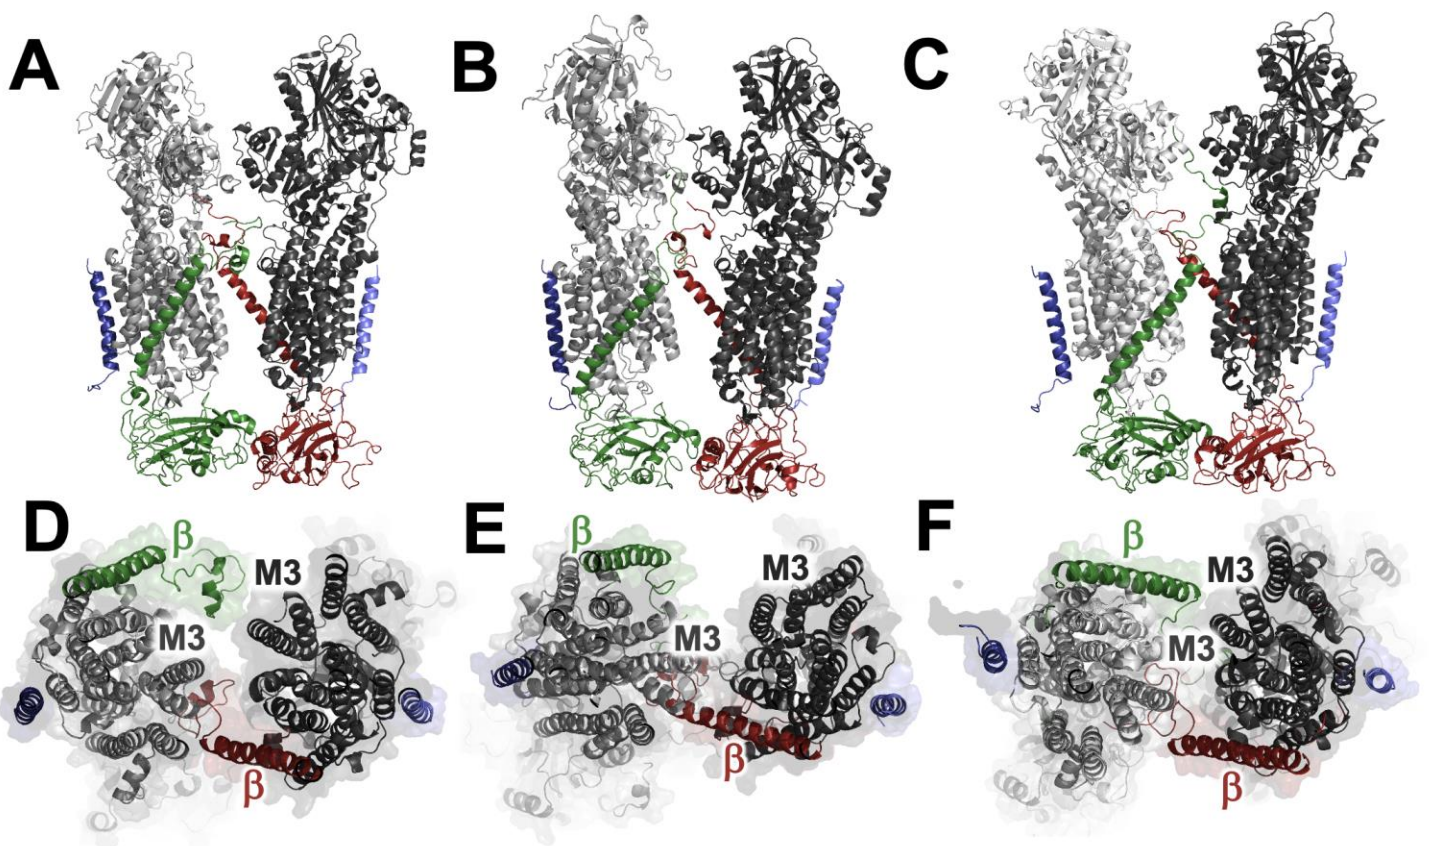

**Sup. Fig. 6:** Structures of alternative Structural Models 1, 2, and 3, showing  $\alpha$  subunits in gray,  $\beta$  subunits in red and green, and FXYD proteins in blue or lavender.
